# Supplementary material for: A Systematic Analysis of miRNA Transcriptome in Marek’s Disease Virus-Induced Lymphoma Reveals Novel and Differentially Expressed miRNAs
Source: PLoS One. 2012 Nov 30;7(11):e51003. doi: 10.1371/journal.pone.0051003 (PMC3511444; doi:10.1371/journal.pone.0051003)
Supplement: Table S1 — Known chicken and MDV miRNAs detected in four samples. (XLS) [file pone.0051003.s002.xls]

## Sheet: Table S1
Table S1.Profile of known chicken and MDV miRNAs in four samples
Chicken-miRNAs						MDV-infected		Non-infected
Index	miRNA name in miRBase 16.0	Known miRNA sequence in miRBase 16.0	Most frequently sequenced miRNAs or isomiRs in each known miRNA alignment	Most aboundant sequence	Length	Tumorous spleen	Lymphoma (tumor from liver)	Spleen	Lymphocytes (peripheral blood)
1	gga-let-7a	TGAGGTAGTAGGTTGTATAGTT	gga-let-7a	TGAGGTAGTAGGTTGTATAGTT	22	187338a	124389	435775	622483
2	gga-let-7b	TGAGGTAGTAGGTTGTGTGGTT	gga-let-7b	TGAGGTAGTAGGTTGTGTGGTT	22	21020	5802	45975	4070
3	gga-let-7c	TGAGGTAGTAGGTTGTATGGTT	gga-let-7c	TGAGGTAGTAGGTTGTATGGTT	22	19391	16707	30096	60794
4	gga-let-7d	AGAGGTAGTGGGTTGCATAGT	gga-let-7d_R+1	AGAGGTAGTGGGTTGCATAGTT	22	296	301	498	947
5	gga-let-7f	TGAGGTAGTAGATTGTATAGTT	gga-let-7f	TGAGGTAGTAGATTGTATAGTT	22	279395	250734	374901	987892
6	gga-let-7g	TGAGGTAGTAGTTTGTACAGT	gga-let-7g_R+1	TGAGGTAGTAGTTTGTACAGTT	22	68939	52424	87637	279503
7	gga-let-7i	TGAGGTAGTAGTTTGTGCTGT	gga-let-7i_R+1	TGAGGTAGTAGTTTGTGCTGTT	22	24823	19997	28547	147614
8	gga-let-7k	TGAGGTAGTAGATTGAATAGTT	gga-let-7k	TGAGGTAGTAGATTGAATAGTT	22	5295	1191	9824	13803
9	gga-miR-100	AACCCGTAGATCCGAACTTGTG	gga-miR-100	AACCCGTAGATCCGAACTTGTG	22	236	98	393	3960
10	gga-miR-101	GTACAGTACTGTGATAACTGAA	gga-miR-101	GTACAGTACTGTGATAACTGAA	22	8030	4156	2692
			gga-miR-101_R-1	GTACAGTACTGTGATAACTGA	21				46477
11	gga-miR-103	AGCAGCATTGTACAGGGCTATGA	gga-miR-103	AGCAGCATTGTACAGGGCTATGA	23	18337	9883	55243	80695
12	gga-miR-106	AAAAGTGCTTACAGTGCAGGTA	gga-miR-106_R+1	AAAAGTGCTTACAGTGCAGGTAG	23	284	153	224	937
13	gga-miR-107	AGCAGCATTGTACAGGGCTATCA	gga-miR-107_R-2	AGCAGCATTGTACAGGGCTAT	21	4043	1292	6492	14668
14	gga-miR-10a	TACCCTGTAGATCCGAATTTGT	gga-miR-10a	TACCCTGTAGATCCGAATTTGT	22	4423	472	3768	221
15	gga-miR-10a*	AAATTCGTATCTAGGGGAATA	gga-miR-10a*_L+1R-1	CAAATTCGTATCTAGGGGAAT	21	33	4	89
16	gga-miR-10b	TACCCTGTAGAACCGAATTTGT	gga-miR-10b	TACCCTGTAGAACCGAATTTGT	22			6	3
			gga-miR-10b_12AN	TACCCTGTAGANCCGAATTTGT	22	5
17	gga-miR-122	TGGAGTGTGACAATGGTGTTTGT	gga-miR-122_R-1	TGGAGTGTGACAATGGTGTTTG	22	892	3095	457	304
18	gga-miR-125b	TCCCTGAGACCCTAACTTGTGA	gga-miR-125b	TCCCTGAGACCCTAACTTGTGA	22	244	323	606	1065
19	gga-miR-126*	CATTATTACTTTTGGTACGCG	gga-miR-126*	CATTATTACTTTTGGTACGCG	21	268	57	624	254
20	gga-miR-126	TCGTACCGTGAGTAATAATGCGC	gga-miR-126_L-1R-1	CGTACCGTGAGTAATAATGCG	21	273	40	262	104
21	gga-miR-128	TCACAGTGAACCGGTCTCTTT	gga-miR-128	TCACAGTGAACCGGTCTCTTT	21	780	1178	1196	4442
22	gga-miR-1306	TGGACGTTGGCTCTGGTGGTGAT	gga-miR-1306_L-2	GACGTTGGCTCTGGTGGTGAT	21				26
			gga-miR-1306_L-3R+2	ACGTTGGCTCTGGTGGTGATGT	22			12
			gga-miR-1306_R-1	TGGACGTTGGCTCTGGTGGTGA	22	18	6
23	gga-miR-130a	CAGTGCAATATTAAAAGGGCAT	gga-miR-130a	CAGTGCAATATTAAAAGGGCAT	22	224	161	697	486
24	gga-miR-130b	CAGTGCAATAATGAAAGGGCGT	gga-miR-130b	CAGTGCAATAATGAAAGGGCGT	22	47	47	134	154
25	gga-miR-130c	CAGTGCAATGTTAAAAGGGCAT	gga-miR-130c	CAGTGCAATGTTAAAAGGGCAT	22	393	218	1050	1609
26	gga-miR-133a	TTGGTCCCCTTCAACCAGCTGT	gga-miR-133a	TTGGTCCCCTTCAACCAGCTGT	22	13	10	15	87
			gga-miR-133a_L+1R-1	TTTGGTCCCCTTCAACCAGCTG	22
27	gga-miR-1329*	CCTCGTAGCTTGATCACGATAT	gga-miR-1329*	CCTCGTAGCTTGATCACGATAT	22	5			13
28	gga-miR-1329	TACAGTGATCACGTTACGATGG	gga-miR-1329_L-1R+2	ACAGTGATCACGTTACGATGGAT	23			14
			gga-miR-1329_L-1R+3	ACAGTGATCACGTTACGATGGATT	24		13		67
			gga-miR-1329_R+1	TACAGTGATCACGTTACGATGGA	23	13
29	gga-miR-133c	TTGGTCCCCTTCAACCAGCTGC	gga-miR-133c_R-1	TTGGTCCCCTTCAACCAGCTG	21				5
30	gga-miR-135a	TATGGCTTTTTATTCCTATGTGA	gga-miR-135a	TATGGCTTTTTATTCCTATGTGA	23	4	3
31	gga-miR-138	AGCTGGTGTTGTGAATC	gga-miR-138_R+6	AGCTGGTGTTGTGAATCAGGCCG	23	56	47	82	117
32	gga-miR-140*	CCACAGGGTAGAACCACGGAC	gga-miR-140*_L+1	ACCACAGGGTAGAACCACGGAC	22	12703	6951	20677	51644
33	gga-miR-140	AGTGGTTTTACCCTATGGTAG	gga-miR-140_L+1	CAGTGGTTTTACCCTATGGTAG	22		8	13	77
			gga-miR-140_L+1R-1	CAGTGGTTTTACCCTATGGTA	21	9
34	gga-miR-142-3p	TGTAGTGTTTCCTACTTTATGG	gga-miR-142-3p	TGTAGTGTTTCCTACTTTATGG	22			145
			gga-miR-142-3p_L-1R+1	GTAGTGTTTCCTACTTTATGGA	22	750	246		4339
35	gga-miR-142-5p	CCCATAAAGTAGAAAGCACTAC	gga-miR-142-5p_L-3R+3	ATAAAGTAGAAAGCACTACTAA	22	2595	1526	2213	8420
36	gga-miR-144	CTACAGTATAGATGATGTACTC	gga-miR-144_L-1	TACAGTATAGATGATGTACTC	21		9	16	711
			gga-miR-144_L-1R-3	TACAGTATAGATGATGTA	18	821
37	gga-miR-1451	TCGCACAGGAGCAAGTTACCGC	gga-miR-1451	TCGCACAGGAGCAAGTTACCGC	22	14	11		23
			gga-miR-1451_R-1	TCGCACAGGAGCAAGTTACCG	21			3
38	gga-miR-1451*	CGTAACTCGCTGCTGTGAGAGGC	gga-miR-1451*_R-1	CGTAACTCGCTGCTGTGAGAGG	22	4			11
39	gga-miR-1456	GAAAGGACGGAGGCGGCCCGCGC	gga-miR-1456_L-1	AAAGGACGGAGGCGGCCCGCGC	22	91	44	51	228
40	gga-miR-1456*	CGGGGTCGTCGCCGTCCCTTC	gga-miR-1456*_R+1	CGGGGTCGTCGCCGTCCCTTCC	22	7			5
41	gga-miR-1458	TTCCTGTGATGCTCATGAGAA	gga-miR-1458	TTCCTGTGATGCTCATGAGAA	21	3
42	gga-miR-146a	TGAGAACTGAATTCCATGGGTT	gga-miR-146a_R+1	TGAGAACTGAATTCCATGGGTTG	23	3300	3084	1299	649
43	gga-miR-146b*	CCCTATGGATTCAGTTCTGC	gga-miR-146b*_L+2	TGCCCTATGGATTCAGTTCTGC	22			7
			gga-miR-146b*_L+2R+1	TGCCCTATGGATTCAGTTCTGCA	23	35	38		47
44	gga-miR-146b	TGAGAACTGAATTCCATAGGCG	gga-miR-146b_R+2	TGAGAACTGAATTCCATAGGCGTT	24	4746	13414	2396	9260
45	gga-miR-146c	TGAGAACTGAATTCCATGGACTG	gga-miR-146c	TGAGAACTGAATTCCATGGACTG	23		37468
			gga-miR-146c_R-1	TGAGAACTGAATTCCATGGACT	22	12978		1157	8182
46	gga-miR-146c*	AGTCCATGGTATTCAGTTCTCT	gga-miR-146c*	AGTCCATGGTATTCAGTTCTCT	22			22	66
			gga-miR-146c*_L-1R+1	GTCCATGGTATTCAGTTCTCTA	22		172
			gga-miR-146c*_L-1R-3	GTCCATGGTATTCAGTTC	18	186
47	gga-miR-147	GTGTGCGGAAATGCTTCTGC	gga-miR-147_R+2	GTGTGCGGAAATGCTTCTGCTA	22	295	348	13	587
48	gga-miR-148a	TCAGTGCACTACAGAACTTTGT	gga-miR-148a	TCAGTGCACTACAGAACTTTGT	22		525	734	1651
			gga-miR-148a_R-6	TCAGTGCACTACAGAA	16	909
49	gga-miR-153	TTGCATAGTCACAAAAGTGA	gga-miR-153_R+1	TTGCATAGTCACAAAAGTGAT	21	3
			gga-miR-153_R+3	TTGCATAGTCACAAAAGTGATCA	23			4
50	gga-miR-155	TTAATGCTAATCGTGATAGGGG	gga-miR-155_R+1	TTAATGCTAATCGTGATAGGGGT	23	960			992
			gga-miR-155_R+2	TTAATGCTAATCGTGATAGGGGTT	24		2323	457
51	gga-miR-1550-5p	TGATGGGGGTGTAGTGCAGCA	gga-miR-1550-5p	TGATGGGGGTGTAGTGCAGCA	21	5
52	gga-miR-1551	CTAGCAGCAAAAAGAACTTCAGA	gga-miR-1551	CTAGCAGCAAAAAGAACTTCAGA	23				18
			gga-miR-1551_L-1	TAGCAGCAAAAAGAACTTCAGA	22	8
			gga-miR-1551_L-1R+1	TAGCAGCAAAAAGAACTTCAGAT	23		10	4
53	gga-miR-1551*	TGAGTTTGTGTTGCTGCTTTCT	gga-miR-1551*	TGAGTTTGTGTTGCTGCTTTCT	22	3	3		4
54	gga-miR-1552-3p	CTAGCTGCTCTGCACTGACTG	gga-miR-1552-3p_R+1	CTAGCTGCTCTGCACTGACTGT	22	5		6
			gga-miR-1552-3p_R+1	CTAGCTGCTCTGCACTGACTGC	22				#N/A
55	gga-miR-1552-5p	TTAGTGCGCGGTAAGCTAGGGTG	gga-miR-1552-5p_R+1	TTAGTGCGCGGTAAGCTAGGGTGT	24	15	3	10	53
56	gga-miR-1559	TTCGATGCTTGTATGCTACTCC	gga-miR-1559	TTCGATGCTTGTATGCTACTCC	22	170	62	82	1403
57	gga-miR-1560	GCATCTCTGGACGCGCTCGTTC	gga-miR-1560	GCATCTCTGGACGCGCTCGTTC	22				11
			gga-miR-1560_L+1	AGCATCTCTGGACGCGCTCGTTC	23	3
58	gga-miR-1563	GCACATGATGAGGAAGCACTGAAA	gga-miR-1563_R-3	GCACATGATGAGGAAGCACTG	21	27	10		5
59	gga-miR-1579	CGTGGCGGGAAGGGATGGGCG	gga-miR-1579_21GA	CGTGGCGGGAAGGGATGGGCA	21				#N/A
60	gga-miR-1590	AGGGACAAATTGCTCTCTGGAAG	gga-miR-1590_R-2	AGGGACAAATTGCTCTCTGGA	21				#N/A
61	gga-miR-15a	TAGCAGCACATAATGGTTTGT	gga-miR-15a	TAGCAGCACATAATGGTTTGT	21	229			1605
			gga-miR-15a_R+1	TAGCAGCACATAATGGTTTGTG	22		73	53
62	gga-miR-15b	TAGCAGCACATCATGGTTTGCA	gga-miR-15b	TAGCAGCACATCATGGTTTGCA	22	3006	1314	736	10298
63	gga-miR-15c	TAGCAGCACATCATGGTTTGTA	gga-miR-15c	TAGCAGCACATCATGGTTTGTA	22	150	71	50
			gga-miR-15c_R-1	TAGCAGCACATCATGGTTTGT	21				933
64	gga-miR-15c*	CAGACCATTCTGGGCTGCCTCA	gga-miR-15c*	CAGACCATTCTGGGCTGCCTCA	22	4			16
65	gga-miR-16	TAGCAGCACGTAAATATTGGTG	gga-miR-16	TAGCAGCACGTAAATATTGGTG	22	820	253	168	3997
66	gga-miR-1603	AGTGGTTGGTTTGGTGCTGTC	gga-miR-1603_R+2	AGTGGTTGGTTTGGTGCTGTCGA	23	3	3		#N/A
67	gga-miR-1618	GAGCCCGGAGCCAGGCTGCTGT	gga-miR-1618_L+1	AGAGCCCGGAGCCAGGCTGCTGT	23				4
68	gga-miR-1631	AAACTGGCGACGTGGGACGGTC	gga-miR-1631_L-3R-1	CTGGCGACGTGGGACGGT	18	3
69	gga-miR-1653	CAGGAGCTGTGCTGCATGCAGG	gga-miR-1653_R-1	CAGGAGCTGTGCTGCATGCAG	21				4
70	gga-miR-1662	TTGACATCATCATACTTGGGAT	gga-miR-1662	TTGACATCATCATACTTGGGAT	22	18	10	14	37
71	gga-miR-1663	TGGCATCCAGAACAGCGGTAC	gga-miR-1663	TGGCATCCAGAACAGCGGTAC	21	12			14
			gga-miR-1663_R+1	TGGCATCCAGAACAGCGGTACC	22		5
72	gga-miR-1677	TGACTTCAGTAGGAGCAGGATT	gga-miR-1677	TGACTTCAGTAGGAGCAGGATT	22	25
			gga-miR-1677_L+1	TTGACTTCAGTAGGAGCAGGATT	23			13
73	gga-miR-1684	AAGTATGAGGAAATGGAGCTCT	gga-miR-1684	AAGTATGAGGAAATGGAGCTCT	22	8	4	42	18
			gga-miR-1684_L+1R-5	TAAGTATGAGGAAATGGA	18	3
74	gga-miR-1699	CCAGAGGGACATGGCAGGGCAA	gga-miR-1699_L-1	CAGAGGGACATGGCAGGGCAA	21	3
75	gga-miR-16c	TAGCAGCACGTAAATACTGGAG	gga-miR-16c	TAGCAGCACGTAAATACTGGAG	22	702	360	270	5108
76	gga-miR-1712	TTCAGTTATCAGTGGAGTTTGG	gga-miR-1712	TTCAGTTATCAGTGGAGTTTGG	22				#N/A
			gga-miR-1712_22GT	TTCAGTTATCAGTGGAGTTTGT	22	4		3
77	gga-miR-1716	AGCGGGGCGGCTGTGAGCTGAGCT	gga-miR-1716_R-2	AGCGGGGCGGCTGTGAGCTGAG	22			3
78	gga-miR-1727	AAGCTGCTCTAATGAACTGAAGG	gga-miR-1727_R-1	AAGCTGCTCTAATGAACTGAAG	22				5
79	gga-miR-1728-3p	AGGCTTCTGTAGATCAGCCAGC	gga-miR-1728-3p	AGGCTTCTGTAGATCAGCCAGC	22			3	6
80	gga-miR-1728-5p	TGGTTGATCCATTGGAAGACTGA	gga-miR-1728-5p	TGGTTGATCCATTGGAAGACTGA	23		4		9
81	gga-miR-1729	ATCCCTTACTCACATGAGTAGTC	gga-miR-1729	ATCCCTTACTCACATGAGTAGTC	23		8	58	212
			gga-miR-1729_R-1	ATCCCTTACTCACATGAGTAGT	22	27
82	gga-miR-1729*	CTACTCGGTGAGTAAGGATAGC	gga-miR-1729*	CTACTCGGTGAGTAAGGATAGC	22			10	28
83	gga-miR-1734	ATATGCCCCAATGTATAAGCT	gga-miR-1734_R+1	ATATGCCCCAATGTATAAGCTA	22				4
84	gga-miR-1736	AGCACCTTCGGAACTGTCCTCA	gga-miR-1736_R-1	AGCACCTTCGGAACTGTCCTC	21				#N/A
85	gga-miR-1736*	AGGGCAATTCCTGATAGGTGCT	gga-miR-1736*_R+2	AGGGCAATTCCTGATAGGTGCTGA	24				#N/A
86	gga-miR-1737	CAGCACTGCTGCGCTCGGTG	gga-miR-1737_L-1	AGCACTGCTGCGCTCGGTG	19	47	18	26	367
87	gga-miR-17-3p	ACTGCAGTGAAGGCACTTGT	gga-miR-17-3p_R+2	ACTGCAGTGAAGGCACTTGTAG	22	154	100	120	427
88	gga-miR-17-5p	CAAAGTGCTTACAGTGCAGGTAGT	gga-miR-17-5p_R-1	CAAAGTGCTTACAGTGCAGGTAG	23	447	302	570	1339
89	gga-miR-1747	TGCACTTGAATGGAGTTCTGGG	gga-miR-1747	TGCACTTGAATGGAGTTCTGGG	22		4
90	gga-miR-1769	AGTGTGAAATCTGCCTGAAAGTC	gga-miR-1769	AGTGTGAAATCTGCCTGAAAGTC	23		6	27
			gga-miR-1769_R-1	AGTGTGAAATCTGCCTGAAAGT	22	5			91
91	gga-miR-1781	TTTAAATCATGCAGCTGTTGA	gga-miR-1781	TTTAAATCATGCAGCTGTTGA	21	15	7	6	94
92	gga-miR-1782	ACATTCATTGGAGCAGGGACA	gga-miR-1782	ACATTCATTGGAGCAGGGACA	21	3		10	5
93	gga-miR-1786	ATTCTTTTCTGCTGTGTTACT	gga-miR-1786_R-1	ATTCTTTTCTGCTGTGTTAC	20				#N/A
94	gga-miR-1798	TGGTTTTCAGAAGTGTAGCGTT	gga-miR-1798_L-3R+2	TTTTCAGAAGTGTAGCGTTTA	21				12
95	gga-miR-1800	ACTACGTGATGCGATCTGATG	gga-miR-1800_L-1	CTACGTGATGCGATCTGATG	20	9
96	gga-miR-181a	AACATTCAACGCTGTCGGTGAGT	gga-miR-181a	AACATTCAACGCTGTCGGTGAGT	23	1387			12165
			gga-miR-181a_R+2	AACATTCAACGCTGTCGGTGAGTTT	25		2085	5494
97	gga-miR-181a*	ACCATCGACCGTTGATTGTACC	gga-miR-181a*	ACCATCGACCGTTGATTGTACC	22	100	55	107	501
98	gga-miR-181b	AACATTCATTGCTGTCGGTGGG	gga-miR-181b_R+2	AACATTCATTGCTGTCGGTGGGTT	24	920	1245	4084	3767
99	gga-miR-184	TGGACGGAGAACTGATAAGGGT	gga-miR-184	TGGACGGAGAACTGATAAGGGT	22	346	103	165	263
100	gga-miR-187	TCGTGTCTTGTGTTGCAGCC	gga-miR-187_L+1R+1	CTCGTGTCTTGTGTTGCAGCCA	22				#N/A
101	gga-miR-18a	TAAGGTGCATCTAGTGCAGATA	gga-miR-18a	TAAGGTGCATCTAGTGCAGATA	22			3
			gga-miR-18a_R-1	TAAGGTGCATCTAGTGCAGAT	21	13	11		74
102	gga-miR-18b	TAAGGTGCATCTAGTGCAGTTA	gga-miR-18b_R-1	TAAGGTGCATCTAGTGCAGTT	21	40	26	7	241
103	gga-miR-190	TGATATGTTTGATATATTAGGT	gga-miR-190	TGATATGTTTGATATATTAGGT	22	3
104	gga-miR-193a	AACTGGCCTACAAAGTCCCAGT	gga-miR-193a	AACTGGCCTACAAAGTCCCAGT	22	34	16	80	157
105	gga-miR-193b	AACTGGCCCACAAAGTCCCGCTTT	gga-miR-193b_R-2	AACTGGCCCACAAAGTCCCGCT	22	71	5	28	136
106	gga-miR-194	TGTAACAGCAACTCCATGTGGA	gga-miR-194_R-1	TGTAACAGCAACTCCATGTGG	21				4
107	gga-miR-199	CCCAGTGTTCAGACTACCTGTTC	gga-miR-199_R-1	CCCAGTGTTCAGACTACCTGTT	22	144	39	562	42
108	gga-miR-199*	TACAGTAGTCTGCACATTGG	gga-miR-199*_L-1R+2	ACAGTAGTCTGCACATTGGTT	21	22606			6516
			gga-miR-199*_L-1R+3	ACAGTAGTCTGCACATTGGTTA	22		4351	87401
109	gga-miR-199b	CAGTAGTCTGCACATTTGGT	gga-miR-199b_L+1	ACAGTAGTCTGCACATTTGGT	21			5	6
			gga-miR-199b_L+1R-3	ACAGTAGTCTGCACATTT	18	6
110	gga-miR-19a	TGTGCAAATCTATGCAAAACTGA	gga-miR-19a	TGTGCAAATCTATGCAAAACTGA	23	36	32	9	45
111	gga-miR-19b	TGTGCAAATCCATGCAAAACTGA	gga-miR-19b	TGTGCAAATCCATGCAAAACTGA	23	685	475	114	570
112	gga-miR-1a	TGGAATGTAAAGAAGTATGTA	gga-miR-1a_R+1	TGGAATGTAAAGAAGTATGTAT	22	11220	1232	15204	95356
113	gga-miR-1b	TGGAATGTTAAGAAGTATGTA	gga-miR-1b_R+1	TGGAATGTTAAGAAGTATGTAT	22	551	815	659	117
114	gga-miR-1c	TGGAATGGAAAGCAGTATGTAT	gga-miR-1c_8GT	TGGAATGTAAAGCAGTATGTAT	22	156	14	74	2170
115	gga-miR-200a	TAACACTGTCTGGTAACGATGT	gga-miR-200a_R+1	TAACACTGTCTGGTAACGATGTT	23	5	70	4	3
116	gga-miR-200b	TAATACTGCCTGGTAATGATGAT	gga-miR-200b	TAATACTGCCTGGTAATGATGAT	23		41	3	6
117	gga-miR-203	GTGAAATGTTTAGGACCACTTG	gga-miR-203	GTGAAATGTTTAGGACCACTTG	22	11	19		7
			gga-miR-203_L-1R+1	TGAAATGTTTAGGACCACTTGT	22			3
118	gga-miR-204	TTCCCTTTGTCATCCTATGCCT	gga-miR-204	TTCCCTTTGTCATCCTATGCCT	22	33	22	33	116
119	gga-miR-206	TGGAATGTAAGGAAGTGTGTGG	gga-miR-206	TGGAATGTAAGGAAGTGTGTGG	22				73
120	gga-miR-20a	TAAAGTGCTTATAGTGCAGGTAG	gga-miR-20a	TAAAGTGCTTATAGTGCAGGTAG	23	121	129	53	653
121	gga-miR-20b	CAAAGTGCTCATAGTGCAGGTAG	gga-miR-20b	CAAAGTGCTCATAGTGCAGGTAG	23	313	261	385	1210
122	gga-miR-21	TAGCTTATCAGACTGATGTTGA	gga-miR-21	TAGCTTATCAGACTGATGTTGA	22				124690
			gga-miR-21_R+1	TAGCTTATCAGACTGATGTTGAC	23	84431	112690	30047
123	gga-miR-2128	TGCAGTGACGTCTCTTCCCC	gga-miR-2128_R-2	TGCAGTGACGTCTCTTCC	18	5			8
124	gga-miR-2131	ATGCAGAAGTGCACGGAAACAGCT	gga-miR-2131	ATGCAGAAGTGCACGGAAACAGCT	24	22	18	41	72
125	gga-miR-215	ATGACCTATGAATTGACAGAC	gga-miR-215	ATGACCTATGAATTGACAGAC	21	17		19	56
			gga-miR-215_R+1	ATGACCTATGAATTGACAGACT	22		8
126	gga-miR-216b	AAATCTCTGCAGGCAAATGTGA	gga-miR-216b	AAATCTCTGCAGGCAAATGTGA	22	3		3
127	gga-miR-217	TACTGCATCAGGAACTGATTGGAT	gga-miR-217_L+1R-3	ATACTGCATCAGGAACTGATTG	22			12
			gga-miR-217_R-1	TACTGCATCAGGAACTGATTGGA	23	5
128	gga-miR-218	TTGTGCTTGATCTAACCATGT	gga-miR-218	TTGTGCTTGATCTAACCATGT	21	5		5	#N/A
129	gga-miR-2188	AAGGTCCAACCTCACATGTCCT	gga-miR-2188	AAGGTCCAACCTCACATGTCCT	22	1008	38	407	1487
130	gga-miR-219	TGATTGTCCAAACGCAATTCT	gga-miR-219_R+1	TGATTGTCCAAACGCAATTCTT	22	9		7
131	gga-miR-22	AAGCTGCCAGTTGAAGAACTGT	gga-miR-22	AAGCTGCCAGTTGAAGAACTGT	22	1461	434	1376	4414
132	gga-miR-22*	AGTTCTTCAGTGGCAAGCTTTA	gga-miR-22*	AGTTCTTCAGTGGCAAGCTTTA	22		11	49	127
			gga-miR-22*_R-1	AGTTCTTCAGTGGCAAGCTTT	21	42
133	gga-miR-221	AGCTACATTGTCTGCTGGGTTTC	gga-miR-221	AGCTACATTGTCTGCTGGGTTTC	23	13100	13696	14181	32684
134	gga-miR-222	AGCTACATCTGGCTACTGGGTCTC	gga-miR-222	AGCTACATCTGGCTACTGGGTCTC	24	2074	4135	1967	3166
135	gga-miR-223	TGTCAGTTTGTCAAATACCCC	gga-miR-223_R+1	TGTCAGTTTGTCAAATACCCCA	22				37646
			gga-miR-223_R+2	TGTCAGTTTGTCAAATACCCCAA	23	774	116	321
136	gga-miR-23b	ATCACATTGCCAGGGATTACC	gga-miR-23b_R+1	ATCACATTGCCAGGGATTACCA	22	58	12	106	192
137	gga-miR-24	TGGCTCAGTTCAGCAGGAACAG	gga-miR-24	TGGCTCAGTTCAGCAGGAACAG	22	769	400	251	1579
138	gga-miR-26a	TTCAAGTAATCCAGGATAGGC	gga-miR-26a_R+1	TTCAAGTAATCCAGGATAGGCT	22	9138	3326	10518	22987
139	gga-miR-27b	TTCACAGTGGCTAAGTTCTGC	gga-miR-27b	TTCACAGTGGCTAAGTTCTGC	21	382	111	210	880
140	gga-miR-2964	CACAAGAATTGCGTTTGGACAA	gga-miR-2964	CACAAGAATTGCGTTTGGACAA	22			642
			gga-miR-2964_R+1	CACAAGAATTGCGTTTGGACAAT	23		145
			gga-miR-2964_R-1	CACAAGAATTGCGTTTGGACA	21	299			1492
141	gga-miR-29b	TAGCACCATTTGAAATCAGTGTT	gga-miR-29b	TAGCACCATTTGAAATCAGTGTT	23	501	1584	106	905
142	gga-miR-29c	TAGCACCATTTGAAATCGGT	gga-miR-29c_R+2	TAGCACCATTTGAAATCGGTTA	22	3139	4783	404	6374
143	gga-miR-301	CAGTGCAATAATATTGTCAAAGCAT	gga-miR-301	CAGTGCAATAATATTGTCAAAGCAT	25			3
			gga-miR-301_R+1	CAGTGCAATAATATTGTCAAAGCATT	26		3
			gga-miR-301_R-6	CAGTGCAATAATATTGTCA	19				8
144	gga-miR-301b-3p	CAGTGCAATAGTATTGTCAAAGCAT	gga-miR-301b-3p	CAGTGCAATAGTATTGTCAAAGCAT	25		3
			gga-miR-301b-3p_R-6	CAGTGCAATAGTATTGTCA	19	7		11	47
145	gga-miR-301b-5p	GCTCTGACTTTATTGCACTACT	gga-miR-301b-5p	GCTCTGACTTTATTGCACTACT	22	19	17	3	170
146	gga-miR-30a-3p	CTTTCAGTCGGATGTTTGCAGC	gga-miR-30a-3p	CTTTCAGTCGGATGTTTGCAGC	22	139	44	289	192
147	gga-miR-30a-5p	TGTAAACATCCTCGACTGGAAG	gga-miR-30a-5p_R+1	TGTAAACATCCTCGACTGGAAGC	23	1446
			gga-miR-30a-5p_R+2	TGTAAACATCCTCGACTGGAAGCT	24		1403	3258	2306
148	gga-miR-30b	TGTAAACATCCTACACTCAGCT	gga-miR-30b	TGTAAACATCCTACACTCAGCT	22	207	46	30	285
149	gga-miR-30c	TGTAAACATCCTACACTCTCAGCT	gga-miR-30c	TGTAAACATCCTACACTCTCAGCT	24	514	398	319	2307
150	gga-miR-30d	TGTAAACATCCCCGACTGGAAG	gga-miR-30d_R+2	TGTAAACATCCCCGACTGGAAGCT	24	6018	16211	8649	25603
151	gga-miR-30e	TGTAAACATCCTTGACTGG	gga-miR-30e_R+5	TGTAAACATCCTTGACTGGAAGCT	24	2277	3702	2402	8759
152	gga-miR-31	AGGCAAGATGTTGGCATAGCTG	gga-miR-31	AGGCAAGATGTTGGCATAGCTG	22	93			14
			gga-miR-31_R+1	AGGCAAGATGTTGGCATAGCTGT	23		31	9
153	gga-miR-32	TATTGCACATTACTAAGTTGC	gga-miR-32_R+2	TATTGCACATTACTAAGTTGCAT	23	19	19	14	94
154	gga-miR-33	GTGCATTGTAGTTGCATTGC	gga-miR-33_R+1	GTGCATTGTAGTTGCATTGCA	21	1122	569	141	4388
155	gga-miR-34a	TGGCAGTGTCTTAGCTGGTTGTT	gga-miR-34a_R-1	TGGCAGTGTCTTAGCTGGTTGT	22	7	9		4
156	gga-miR-34b	CAGGCAGTGTAGTTAGCTGATTG	gga-miR-34b_L-1R+1	AGGCAGTGTAGTTAGCTGATTGT	23	11	6	25	7
157	gga-miR-34c	AGGCAGTGTAGTTAGCTGATTGC	gga-miR-34c	AGGCAGTGTAGTTAGCTGATTGC	23	4		9
			gga-miR-34c_R-1	AGGCAGTGTAGTTAGCTGATTG	22		5
158	gga-miR-3529	AGGCAGACTGTGACTTGTTGT	gga-miR-3529	AGGCAGACTGTGACTTGTTGT	21	7	4	3	28
159	gga-miR-3530	CAATGGTGTGAGCTGGGATGG	gga-miR-3530_L+1	ACAATGGTGTGAGCTGGGATGG	22				7
			gga-miR-3530_R+1	CAATGGTGTGAGCTGGGATGGG	22			4
160	gga-miR-3532	TTGGAGGCTGCAGTGTCATGGT	gga-miR-3532	TTGGAGGCTGCAGTGTCATGGT	22	7
161	gga-miR-3534	TGTGGGTTGACAGTGCTGAGGT	gga-miR-3534	TGTGGGTTGACAGTGCTGAGGT	22		5
162	gga-miR-3535	GGATATGATGACTGATTATCTGAAA	gga-miR-3535_24AC	GGATATGATGACTGATTATCTGACA	25				#N/A
163	gga-miR-3536	CTGCATACGAGTAGACCCTTTC	gga-miR-3536_R+1	CTGCATACGAGTAGACCCTTTCT	23			3
			gga-miR-3536_R-1	CTGCATACGAGTAGACCCTTT	21	3
164	gga-miR-3538	GTTCGGTGATGAAACCATGGA	gga-miR-3538_R+3	GTTCGGTGATGAAACCATGGAAAA	24				#N/A
165	gga-miR-3539	CAGAGGAAGACTGATGCTAGTT	gga-miR-3539	CAGAGGAAGACTGATGCTAGTT	22	4		5
166	gga-miR-365	TAATGCCCCTAAAAATCCTTAT	gga-miR-365	TAATGCCCCTAAAAATCCTTAT	22	10	4	5	52
167	gga-miR-375	TTTGTTCGTTCGGCTCGCGTTA	gga-miR-375	TTTGTTCGTTCGGCTCGCGTTA	22	7	56
168	gga-miR-383	AGATCAGAAGGTGATTGTGGCT	gga-miR-383	AGATCAGAAGGTGATTGTGGCT	22	26	5	285
169	gga-miR-429	TAATACTGTCTGGTAATGCCGT	gga-miR-429	TAATACTGTCTGGTAATGCCGT	22	9	6
170	gga-miR-449	TGGCAGTGTATGTTAGCTGGT	gga-miR-449	TGGCAGTGTATGTTAGCTGGT	21	14	3	11
171	gga-miR-451	AAACCGTTACCATTACTGAGTTT	gga-miR-451	AAACCGTTACCATTACTGAGTTT	23	9390	679	5675	7150
172	gga-miR-454	TAGTGCAATATTGCTTATAGGGT	gga-miR-454	TAGTGCAATATTGCTTATAGGGT	23	10
			gga-miR-454_R+2	TAGTGCAATATTGCTTATAGGGTCT	25		20		13
173	gga-miR-455-3p	TGCAGTCCATGGGCATATACAC	gga-miR-455-3p	TGCAGTCCATGGGCATATACAC	22	16
			gga-miR-455-3p_L+1	ATGCAGTCCATGGGCATATACAC	23		3	21
174	gga-miR-455-5p	TATGTGCCCTTGGACTACATCG	gga-miR-455-5p	TATGTGCCCTTGGACTACATCG	22	32	6	16
175	gga-miR-456	CAGGCTGGTTAGATGGTTGTCA	gga-miR-456	CAGGCTGGTTAGATGGTTGTCA	22	756	427	1117	1883
176	gga-miR-458	ATAGCTCTTTGAATGGTACTGC	gga-miR-458	ATAGCTCTTTGAATGGTACTGC	22	9	4	40	149
177	gga-miR-460a	CCTGCATTGTACACACTGTGTG	gga-miR-460a	CCTGCATTGTACACACTGTGTG	22			98	6
			gga-miR-460a_R-1	CCTGCATTGTACACACTGTGT	21	18	3
178	gga-miR-460b-3p	CACAGCGCATGCAATGTGGACAT	gga-miR-460b-3p_L-1R-1	ACAGCGCATGCAATGTGGACA	21				4
179	gga-miR-490	CAACCTGGAGGACTCCATGCTG	gga-miR-490_R+1	CAACCTGGAGGACTCCATGCTGT	23			9
180	gga-miR-499	TTAAGACTTGTAGTGATGTTTAG	gga-miR-499_R-1	TTAAGACTTGTAGTGATGTTTA	22		6
			gga-miR-499_R-2	TTAAGACTTGTAGTGATGTTT	21	288		284	150
181	gga-miR-7	TGGAAGACTAGTGATTTTGTTG	gga-miR-7_R+2	TGGAAGACTAGTGATTTTGTTGTT	24	675	401	167	1192
182	gga-miR-7b	TGGAAGACTAGTGATTTTTGTT	gga-miR-7b_R-6	TGGAAGACTAGTGATT	16	324	6		34
183	gga-miR-9	TCTTTGGTTATCTAGCTGTATGA	gga-miR-9	TCTTTGGTTATCTAGCTGTATGA	23	25	39	20	86
184	gga-miR-92	TATTGCACTTGTCCCGGCCTG	gga-miR-92_R+1	TATTGCACTTGTCCCGGCCTGT	22	23172	35732	10536	229667
185	gga-miR-99a	AACCCGTAGATCCGATCTTGTG	gga-miR-99a	AACCCGTAGATCCGATCTTGTG	22	853	581	1377	6295
186	gga-miR-99a*	CAAGCTCGCTTCTATGGGTCT	gga-miR-99a*_R+2	CAAGCTCGCTTCTATGGGTCTGT	23	23	26	41	128
187	gga-miR-2954	CATCCCCATTCCACTCCTAGCA	gga-miR-2954_10TC	CATCCCCATCCCACTCCTAGCA	22				8
			gga-miR-2954_R+1	CATCCCCATTCCACTCCTAGCAG	23	1798	1461	6252
			gga-miR-2954-5p	TGCTGAGAGGGCTTGGGGAGAGGA	24	176	183	38
MDV-miRNA
1	mdv1-mir-M1*	TGCTGCGCATGAAAGAGCGA	mdv1-miR-M1*_L+1	ATGCTGCGCATGAAAGAGCGA	21	31	18
2	mdv1-mir-M1	TGCTTGTTCACTGTGCGGCA	mdv1-miR-M1_R+2	TGCTTGTTCACTGTGCGGCATT	22	13648	21823
3	mdv1-mir-M10-3p	TCGAAATCTCTACGAGATAACA	mdv1-miR-M10-3p_L-2	GAAATCTCTACGAGATAACA	20	24	16
4	mdv1-mir-M10-5p	GCGTTGTCTCGTAGAGGTCCAG	mdv1-miR-M10-5p_R+1	GCGTTGTCTCGTAGAGGTCCAGA	23	1535	2001
5	mdv1-mir-M12	TGCATAATACGGAGGGTTCT	mdv1-miR-M12_L+1R+3	TTGCATAATACGGAGGGTTCTGTT	24	999	3321
6	mdv1-mir-M2-3p	CGGACTGCCGCAGAATAGCTT	mdv1-miR-M2-3p_20TC	CGGACTGCCGCAGAATAGCCT	21	155	222
7	mdv1-mir-M2-5p	GTTGTATTCTGCCCGGTAGTCCG	mdv1-miR-M2-5p_R+123GA	GTTGTATTCTGCCCGGTAGTCCAT	24	4
			mdv1-miR-M2-5p_R+3	GTTGTATTCTGCCCGGTAGTCCGTAT	26	4	124
8	mdv1-mir-M31	TGCTACAGTCGTGAGCAGATCAA	mdv1-miR-M31_R-1	TGCTACAGTCGTGAGCAGATCA	22	843	534
9	mdv1-mir-M4*	AATGGTTCTGACAGCATGACC	mdv1-miR-M4*_R+121CT	AATGGTTCTGACAGCATGACTT	22	33	37
10	mdv1-mir-M4	TTAATGCTGTATCGGAACCCTTC	mdv1-miR-M4_R+2	TTAATGCTGTATCGGAACCCTTCAT	25		159
			mdv1-miR-M4_R-517AC	TTAATGCTGTATCGGACC	18	29
11	mdv1-mir-M5	TGTGTATCGTGGTCGTCTACTGT	mdv1-miR-M5_R-2	TGTGTATCGTGGTCGTCTACT	21	4867	5507
12	mdv1-mir-M6-3p	GAGATCCCTGCGAAATGACAGT	mdv1-miR-M6-3p_L-1	AGATCCCTGCGAAATGACAGT	16	211	122
13	mdv1-mir-M7*	TGTTATCTCGGGGAGATCCCGAT	mdv1-miR-M7*_R-4	TGTTATCTCGGGGAGATCC	19	94	16
14	mdv1-mir-M7	TCGAGATCTCTACGAGATTACAG	mdv1-miR-M7_R-1	TCGAGATCTCTACGAGATTACA	22		33
			mdv1-miR-M7_L-2R-1	GAGATCTCTACGAGATTACA	20	31
15	mdv1-mir-M8-5p	TATTGTTCTGTGGTTGGTTTCG	mdv1-miR-M8-5p	TATTGTTCTGTGGTTGGTTTCG	22	37824
			mdv1-miR-M8-5p_R+1	TATTGTTCTGTGGTTGGTTTCGA	23		125762
16	mdv1-mir-M9-5p	TTTTCTCCTTCCCCCCGGAGTT	mdv1-miR-M9-5p_R+1	TTTTCTCCTTCCCCCCGGAGTTC	21	61	211
a.Only the most frequently sequenced isomiR and its counts in each sample is listed
