# Supplementary material for: A Systematic Analysis of miRNA Transcriptome in Marek’s Disease Virus-Induced Lymphoma Reveals Novel and Differentially Expressed miRNAs
Source: PLoS One. 2012 Nov 30;7(11):e51003. doi: 10.1371/journal.pone.0051003 (PMC3511444; doi:10.1371/journal.pone.0051003)
Supplement: Table S10 — Differential expression analysis of miRNAs in MDV-infected compared with non-infected samples using IDEG6. (XLS) [file pone.0051003.s011.xls]

## Sheet: Table S10
Table S10. Differential expression analysis of miRNAs in MDV-infected compared with non-infected samples using IDEG6
	MDV-infected		Non-infected		MDV-infected		Non-infected		MDV-infected tumorous spleen vs. Non-infected spleen				MD lymphoma vs. Non-infected lymphocytes				MD lymphoma vs. Non-infected spleen
miR_name	Spleen	Lymphoma	Spleen	Lymphocytes	Spleen (norm)	Lymphoma (norm)	Spleen (norm)	Lymphocytes (norm)	Audic and Claverie (P values)	Fisher exact test (P values)	Chi-squared 2X2 (P values)	Regualtionb	Audic and Claverie (P values)	Fisher exact test (P values)	Chi-squared 2X2 (P values)	Regualtionb	Audic and Claverie (P values)	Fisher exact test (P values)	Chi-squared 2X2 (P values)	Regualtionb
gga-let-7f	360616a	304275	468067	1315575	713.6	652.6	842.3	1908.1	0	0	0	down	0	0	0	down	0	0	0	down
gga-let-7a	292117	173058	652961	1017200	578.1	371.2	1174.1	1475.4	0	0	0	down	0	0	0	down	0	0	0	down
gga-let-7g	99829	68529	126671	413818	197.6	146.1	227.9	600.2	0	0	0	down	0	0	0	down	0	0	0	down
gga-let-7i	46713	33214	56089	300224	92.4	71.2	100.9	435.5	0	0	0	down	0	0	0	down	0	0	0	down
gga-miR-221	31671	28491	36500	98010	62.7	61.1	65.7	142.2	0	0	0	down	0	0	0	down	0	0	0	down
gga-let-7c	33159	25195	49722	116997	65.6	54	89.5	169.7	0	0	0	down	0	0	0	down	0	0	0	down
gga-miR-140*	45110	24393	52749	220818	89.3	52.3	94.9	320.3	0	0	0	down	0	0	0	down	0	0	0	down
gga-miR-103	32117	15213	86856	141875	63.6	32.6	156.3	205.8	0	0	0	down	0	0	0	down	0	0	0	down
gga-miR-199*	61748	13939	243757	23853	122.2	29.9	438.6	34.6	0	0	0	down	0	0	0	down	0	0	0	down
gga-miR-181a	6294	4725	23970	55572	12.5	10.1	43.1	80.6	0	0	0	down	0	0	0	down	0	0	0	down
gga-miR-456	7303	3613	13169	19523	14.5	7.7	23.7	28.3	0	0	0	down	0	0	0	down	0	0	0	down
gga-miR-107	9666	3235	18238	31018	19.1	6.9	32.8	44.1	0	0	0	down	0	0	0	down	0	0	0	down
gga-miR-181b	2177	2546	9723	11391	4.3	5.5	17.5	16.5	0	0	0	down	0	0	0	down	0	0	0	down
gga-let-7k	9837	2252	15358	23435	19.5	4.8	27.6	33.1	0	0	0	down	0	0	0	down	0	0	0	down
gga-miR-1a	14667	1853	18541	117384	29	3.1	33.4	170.3	0	0	0	down	0	0	0	down	0	0	0	down
gga-miR-99a	1876	955	3359	17989	3.7	2	6	26.1	0	0	0	down	0	0	0	down	0	0	0	down
gga-let-7d	539	497	979	2510	1.1	1.1	1.8	3.6	0	0	0	down	0	0	0	down	0	0	0	down
gga-miR-125b	357	412	856	1631	0.7	0.9	1.5	2.4	0	0	0	down	0	0	0	down	0	0	0	down
gga-miR-2964	820	340	2031	4496	1.6	0.7	3.7	6.5	0	0	0	down	0	0	0	down	0	0	0	down
gga-miR-130c	528	290	1405	2466	1	0.6	2.5	3.6	0	0	0	down	0	0	0	down	0	0	0	down
gga-miR-100	983	278	2116	21713	1.9	0.6	3.8	31.5	0	0	0	down	0	0	0	down	0	0	0	down
gga-miR-130a	341	248	1179	901	0.7	0.5	2.1	1.3	0	0	0	down	0	0	0	down	0	0	0	down
gga-miR-30a-3p	381	85	675	561	0.8	0.2	1.2	0.8	0	0	0	down	0	0	0	down	0	0	0	down
gga-miR-130b	63	50	202	234	0.1	0.1	0.4	0.3	0	0	0	down	0	0	0	down	0	0	0	down
gga-miR-193a	41	16	96	218	0.1	0	0.2	0.3	5e-06	3.4e-05	3.4e-05	down	0	0	0	down	0	0	0	down
gga-miR-1769	12	9	67	212	0	0	0.1	0.3	0	0	0	down	0	0	0	down	0	0	0	down
gga-miR-1684	21	4	64	50	0	0	0.1	0.1	4e-06	1.8e-05	2.3e-05	down	0	0	1e-06	down	0	0	0	down
gga-miR-458	9	4	75	254	0	0	0.1	0.4	0	0	0	down	0	0	0	down	0	0	0	down
gga-miR-21	253918	246772	108872	347704	502.5	529.2	195.9	504.3	0	0	0	up	0	0	0	up	0	0	0	up
gga-miR-146c	31407	99065	2432	16804	62.2	212.5	4.4	24.4	0	0	0	up	0	0	0	up	0	0	0	up
gga-miR-146b	11348	25346	4703	15407	22.5	54.4	8.5	22.3	0	0	0	up	0	0	0	up	0	0	0	up
gga-miR-146a	7123	5761	2670	1395	14.1	12.4	4.8	2	0	0	0	up	0	0	0	up	0	0	0	up
gga-miR-222	6463	8026	4184	9079	12.8	17.2	7.5	13.2	0	0	0	up	0	0	0	up	0	0	0	up
gga-miR-155	2719	6514	1260	2628	5.4	13.1	2.3	3.8	0	0	0	up	0	0	0	up	0	0	0	up
gga-miR-122	2044	6560	978	703	4	14.1	1.8	1	0	0	0	up	0	0	0	up	0	0	0	up
gga-miR-29b	961	2375	168	1680	1.9	5.1	0.3	2.4	0	0	0	up	0	0	0	up	0	0	0	up
gga-miR-146c*	594	721	25	193	1.2	1.5	0	0.3	0	0	0	up	0	0	0	up	0	0	0	up
gga-miR-31	182	63	17	28	0.4	0.1	0	0	0	0	0	up	0	0	0	up	0	0	0	up
gga-miR-203	27	57	3	25	0.1	0.1	0	0	1e-06	1e-06	3e-06	up	0	0	0	up	0	0	0	up
a. Counts from all isoforms of one miRNA
b."up" means miRNA was up-regulated in MDV-infected sample;"down" means miRNA was down-regulated in MDV-infected sample
miRNAs marked in yellow were selected to be further verified by qPCR
