# Supplementary material for: A Systematic Analysis of miRNA Transcriptome in Marek’s Disease Virus-Induced Lymphoma Reveals Novel and Differentially Expressed miRNAs
Source: PLoS One. 2012 Nov 30;7(11):e51003. doi: 10.1371/journal.pone.0051003 (PMC3511444; doi:10.1371/journal.pone.0051003)
Supplement: Table S13 — Primers used in qPCR for seventeen miRNA candidates and nine known miRNAs. (XLS) [file pone.0051003.s014.xls]

## Sheet: Table S13
Table S13. Primers used in qPCR for seventeen miRNA candidates and nine known miRNAs
miRNA_name	Stem-loop RT primer	Forward_primer	Reverse_primer
PN-cfa-miR-107_R+2	GTCGTATCCAGTGCAGGGTCCGAGGTATTCGCACTGGATACGACACATAGC	TGCACAGCAGCATTGTACAGG	GTGCAGGGTCCGAGGT
PN-xtr-miR-23a_R+1	GTCGTATCCAGTGCAGGGTCCGAGGTATTCGCACTGGATACGACTGGAAAT	CGTAGATCACATTGCCAGGG	GTGCAGGGTCCGAGGT
PN-xtr-miR-20b_R+1	GTCGTATCCAGTGCAGGGTCCGAGGTATTCGCACTGGATACGACACTACC	CGGTGTCAAAGTGCTCATAGTGC	GTGCAGGGTCCGAGGT
PN-rno-miR-214_R+1	GTCGTATCCAGTGCAGGGTCCGAGGTATTCGCACTGGATACGACACTGCC	TTAGTTCACAGCAGGCACAGACAG	GTGCAGGGTCCGAGGT
PN-xtr-miR-26_R+3	GTCGTATCCAGTGCAGGGTCCGAGGTATTCGCACTGGATACGACAAAGCC	CGGCATTCAAGTAATCCAGGATAG	GTGCAGGGTCCGAGGT
PN-tgu-miR-425-5p_R+1	GTCGTATCCAGTGCAGGGTCCGAGGTATTCGCACTGGATACGACTCAGCG	CGGCTAATGACACGATCACTCC	GTGCAGGGTCCGAGGT
PN-tgu-miR-1388	GTCGTATCCAGTGCAGGGTCCGAGGTATTCGCACTGGATACGACCATGGG	GCCGTAATCTCAGGTTCGTCAG	GTGCAGGGTCCGAGGT
PN-xtr-miR-214_R-4	GTCGTATCCAGTGCAGGGTCCGAGGTATTCGCACTGGATACGACCTGTCT	TGAGCATTTACAGCAGGCACAG	GTGCAGGGTCCGAGGT
PN-xtr-miR-125b_L-1R+1	GTCGTATCCAGTGCAGGGTCCGAGGTATTCGCACTGGATACGACATCACA	CAGTGAAGCCCTGAGACCCTAAC	GTGCAGGGTCCGAGGT
PN-hsa-miR-150_12TC	GTCGTATCCAGTGCAGGGTCCGAGGTATTCGCACTGGATACGACCACTGG	GTAGTGATTCTCCCAACCCCTGT	GTGCAGGGTCCGAGGT
PN-mmu-miR-1937a_L-118CT	GTCGTATCCAGTGCAGGGTCCGAGGTATTCGCACTGGATACGACTAGGGG	CATGTACTATGATCCCGGACGAG	GTGCAGGGTCCGAGGT
PC597-5p	GTCGTATCCAGTGCAGGGTCCGAGGTATTCGCACTGGATACGACGGCGCGG	ATAATAAGGGAGAGGACCGCCG	GTGCAGGGTCCGAGGT
PC556-3p	GTCGTATCCAGTGCAGGGTCCGAGGTATTCGCACTGGATACGACCGGCCTC	AATAATATCCGGCGCGGG	GTGCAGGGTCCGAGGT
PC30-5p	GTCGTATCCAGTGCAGGGTCCGAGGTATTCGCACTGGATACGACTGGCCC	ATAGGATTCAACCCGGCGG	GTGCAGGGTCCGAGGT
PC495-3p	GTCGTATCCAGTGCAGGGTCCGAGGTATTCGCACTGGATACGACCGCCTC	TTATGAGGGAGGGCGGGAG	GTGCAGGGTCCGAGGT
PC34-3p	GTCGTATCCAGTGCAGGGTCCGAGGTATTCGCACTGGATACGACTTCTCG	TAATTGCCCTGCCGGAGC	GTGCAGGGTCCGAGGT
PC306-5p	GTCGTATCCAGTGCAGGGTCCGAGGTATTCGCACTGGATACGACCTGACG	GATATCGATGAACTCCGGGGAC	GTGCAGGGTCCGAGGT
gga-miR-181a	GTCGTATCCAGTGCAGGGTCCGAGGTATTCGCACTGGATACGACACTCACC	CGAGAGGTAACATTCAACGCTGTC	GTGCAGGGTCCGAGGT
gga-miR-146c	GTCGTATCCAGTGCAGGGTCCGAGGTATTCGCACTGGATACGACCAGTCCAT	GGCACTCCTGAGAACTGAATTCC	AGGGTCCGAGGTATTCGC
gga-miR-221	GTCGTATCCAGTGCAGGGTCCGAGGTATTCGCACTGGATACGACGAAACCCA	TGTGCCAAGCTACATTGTCTGC	GTGCAGGGTCCGAGGT
gga-miR-222	GTCGTATCCAGTGCAGGGTCCGAGGTATTCGCACTGGATACGACGAGACC	GTGGCTAAGCTACATCTGGCTACTG	GTGCAGGGTCCGAGGT
gga-miR-155	GTCGTATCCAGTGCAGGGTCCGAGGTATTCGCACTGGATACGACACCCCT	GCCGCTCTTAATGCTAATCGTG	GTGCAGGGTCCGAGGT
gga-miR-26a	GTCGTATCCAGTGCAGGGTCCGAGGTATTCGCACTGGATACGACAGCCTAT	GCCAGAGCTTCAAGTAATCCAGG	GTGCAGGGTCCGAGGT
gga-miR-140*	GTCGTATCCAGTGCAGGGTCCGAGGTATTCGCACTGGATACGACGTCCGTG	CATTAGGCAACCACAGGGTAGAAC	GTGCAGGGTCCGAGGT
gga-miR-199*	GTCGTATCCAGTGCAGGGTCCGAGGTATTCGCACTGGATACGACTAACCA	CCATCAGGACAGTAGTCTGCACAT	GTGCAGGGTCCGAGGT
gga-miR-146b	GTCGTATCCAGTGCAGGGTCCGAGGTATTCGCACTGGATACGACAACGCC	GTGAGGCTGAGAACTGAATTCCATA	GTGCAGGGTCCGAGGT
